# Supplementary material for: Recapitulation-like developmental transitions of chromatin accessibility in vertebrates
Source: PubMed Central journal article supplement (PMC6857340; doi:10.1186/s40851-019-0148-9), 2019-11-14
Supplement: 40851_2019_148_MOESM1_ESM.pdf [file 40851_2019_148_MOESM1_ESM.pdf]

## Additional file 1: Supplementary Tables

**Table S1.** Information on whole-embryo ATAC-seq samples.

| <b>Species</b> | <b>Developmental stage</b> | <b>Biological replicate number</b> | <b>Number of embryos pooled</b> | <b>Number of cells for ATAC-seq</b> | <b>Filtered reads</b> |             |
|----------------|----------------------------|------------------------------------|---------------------------------|-------------------------------------|-----------------------|-------------|
| Mouse          | E7.5                       | 1                                  | 16                              | 50,000                              | 163,806,138           |             |
|                | E7.5                       | 2                                  | 18                              | 50,000                              | 150,590,012           |             |
|                | E7.5                       | 3                                  | 15                              | 50,000                              | 123,878,902           |             |
|                | E8.5                       | 1                                  | 15                              | 50,000                              | 146,637,870           |             |
|                | E8.5                       | 2                                  | 6                               | 50,000                              | 160,013,422           |             |
|                | E8.5                       | 3                                  | 14                              | 50,000                              | 139,587,780           |             |
|                | E9.5                       | 1                                  | 6                               | 500,000                             | 133,768,752           |             |
|                | E9.5                       | 2                                  | 15                              | 500,000                             | 152,951,300           |             |
|                | E9.5                       | 3                                  | 6                               | 500,000                             | 138,861,218           |             |
|                | E10.5                      | 1                                  | 6                               | 500,000                             | 152,238,300           |             |
|                | E10.5                      | 2                                  | 8                               | 500,000                             | 149,835,156           |             |
|                | E10.5                      | 3                                  | 8                               | 500,000                             | 141,327,110           |             |
|                | E12.5                      | 1                                  | 2                               | 500,000                             | 143,046,480           |             |
|                | E12.5                      | 2                                  | 2                               | 500,000                             | 139,967,892           |             |
|                | E12.5                      | 3                                  | 2                               | 500,000                             | 172,080,896           |             |
|                | E14.5                      | 1                                  | 2                               | 500,000                             | 148,176,792           |             |
|                | E14.5                      | 2                                  | 2                               | 500,000                             | 139,462,932           |             |
|                | E14.5                      | 3                                  | 2                               | 500,000                             | 139,744,522           |             |
|                | E16.5                      | 1                                  | 2                               | 500,000                             | 137,658,622           |             |
|                | E16.5                      | 2                                  | 2                               | 500,000                             | 161,752,784           |             |
|                | E16.5                      | 3                                  | 2                               | 500,000                             | 121,824,564           |             |
|                | E18.5                      | 1                                  | 2                               | 500,000                             | 147,274,838           |             |
|                | E18.5                      | 2                                  | 2                               | 500,000                             | 171,704,282           |             |
|                | E18.5                      | 3                                  | 2                               | 500,000                             | 168,567,462           |             |
|                | Chicken                    | HH6                                | 1                               | 5                                   | 500,000               | 150,293,014 |
|                |                            | HH6                                | 2                               | 4                                   | 500,000               | 160,558,314 |
|                |                            | HH6                                | 3                               | 4                                   | 500,000               | 144,524,764 |
|                |                            | HH11                               | 1                               | 5                                   | 500,000               | 133,312,472 |
|                |                            | HH11                               | 2                               | 5                                   | 500,000               | 129,538,096 |
|                |                            | HH11                               | 3                               | 4                                   | 500,000               | 135,804,384 |
| HH16           |                            | 1                                  | 7                               | 500,000                             | 136,976,744           |             |
| HH16           |                            | 2                                  | 7                               | 500,000                             | 138,557,562           |             |
| HH16           |                            | 3                                  | 7                               | 500,000                             | 129,294,694           |             |
| HH19           |                            | 1                                  | 4                               | 500,000                             | 131,750,406           |             |
| HH19           |                            | 2                                  | 4                               | 500,000                             | 152,140,888           |             |
| HH19           |                            | 3                                  | 4                               | 500,000                             | 158,072,072           |             |
| HH24           |                            | 1                                  | 2                               | 500,000                             | 139,759,998           |             |
| HH24           |                            | 2                                  | 2                               | 500,000                             | 137,259,058           |             |
| HH24           |                            | 3                                  | 2                               | 500,000                             | 152,682,324           |             |
| HH28           |                            | 1                                  | 2                               | 500,000                             | 124,272,006           |             |
| HH28           |                            | 2                                  | 2                               | 500,000                             | 116,448,198           |             |
| HH28           |                            | 3                                  | 2                               | 500,000                             | 122,776,106           |             |
| HH32           |                            | 1                                  | 2                               | 500,000                             | 142,818,500           |             |
| HH32           |                            | 2                                  | 2                               | 500,000                             | 145,458,928           |             |
| HH32           |                            | 3                                  | 2                               | 500,000                             | 157,787,170           |             |
| HH38           | 1                          | 2                                  | 500,000                         | 156,110,422                         |                       |             |
| HH38           | 2                          | 2                                  | 500,000                         | 142,826,992                         |                       |             |
| HH38           | 3                          | 2                                  | 500,000                         | 148,502,578                         |                       |             |
| Medaka         | Stage 15                   | 1                                  | 73                              | 50,000                              | 146,821,406           |             |

|          |   |    |         |             |
|----------|---|----|---------|-------------|
| Stage 15 | 2 | 74 | 50,000  | 122,253,936 |
| Stage 15 | 3 | 73 | 50,000  | 111,469,822 |
| Stage 21 | 1 | 40 | 50,000  | 315,598,798 |
| Stage 21 | 2 | 30 | 50,000  | 218,284,158 |
| Stage 21 | 3 | 37 | 50,000  | 303,105,284 |
| Stage 24 | 1 | 66 | 500,000 | 185,387,768 |
| Stage 24 | 2 | 40 | 500,000 | 214,447,928 |
| Stage 24 | 3 | 40 | 500,000 | 201,949,114 |
| Stage 28 | 1 | 30 | 500,000 | 136,739,522 |
| Stage 28 | 2 | 30 | 500,000 | 134,723,176 |
| Stage 28 | 3 | 37 | 500,000 | 143,599,588 |
| Stage 32 | 1 | 20 | 500,000 | 149,691,470 |
| Stage 32 | 2 | 24 | 500,000 | 120,335,888 |
| Stage 32 | 3 | 19 | 500,000 | 153,597,756 |
| Stage 36 | 1 | 17 | 500,000 | 123,633,866 |
| Stage 36 | 2 | 24 | 500,000 | 86,787,606  |
| Stage 36 | 3 | 17 | 500,000 | 169,536,716 |
| Stage 40 | 1 | 9  | 500,000 | 116,558,148 |
| Stage 40 | 2 | 3  | 500,000 | 197,537,256 |
| Stage 40 | 3 | 6  | 500,000 | 138,102,580 |

**Table S2.** Numbers of ACRs at each developmental stage.

| Species | Developmental stage | Number of ACRs |
|---------|---------------------|----------------|
| Mouse   | E7.5                | 159,511        |
|         | E8.5                | 220,908        |
|         | E9.5                | 226,497        |
|         | E10.5               | 232,539        |
|         | E12.5               | 258,350        |
|         | E14.5               | 232,001        |
|         | E16.5               | 234,434        |
|         | E18.5               | 263,158        |
| Chicken | HH6                 | 292,196        |
|         | HH11                | 297,167        |
|         | HH16                | 302,889        |
|         | HH19                | 310,539        |
|         | HH24                | 329,279        |
|         | HH28                | 342,874        |
|         | HH32                | 354,700        |
|         | HH38                | 304,751        |
| Medaka  | Stage 15            | 191,151        |
|         | Stage 21            | 200,464        |
|         | Stage 24            | 214,908        |
|         | Stage 28            | 199,302        |
|         | Stage 32            | 213,963        |
|         | Stage 36            | 211,107        |
|         | Stage 40            | 187,170        |

**Table S3.** FRiP score of whole-embryo ATAC-seq data.

| Species | Developmental stage | FRiP score* |
|---------|---------------------|-------------|
| Mouse   | E7.5                | 0.264       |
|         | E8.5                | 0.393       |
|         | E9.5                | 0.366       |
|         | E10.5               | 0.405       |
|         | E12.5               | 0.386       |
|         | E14.5               | 0.313       |
|         | E16.5               | 0.264       |
|         | E18.5               | 0.201       |
| Chicken | HH6                 | 0.274       |
|         | HH11                | 0.354       |
|         | HH16                | 0.530       |
|         | HH19                | 0.539       |
|         | HH24                | 0.470       |
|         | HH28                | 0.418       |
|         | HH32                | 0.412       |
|         | HH38                | 0.301       |
| Medaka  | Stage 15            | 0.279       |
|         | Stage 21            | 0.274       |
|         | Stage 24            | 0.374       |
|         | Stage 28            | 0.430       |
|         | Stage 32            | 0.454       |
|         | Stage 36            | 0.472       |
|         | Stage 40            | 0.383       |

\*The FRiP score is a genome-wide, quality metric of the signal-to-background ratio, and it is defined as a fraction of all aligned reads in the called peak regions [62]. According to the quality standard defined by the ENCODE consortium [63], the ATAC-seq data with >0.2 FRiP scores are acceptable.

**Table S4.** The numbers of ACRs at promoters and the two-sided Fisher's exact test.

| Species | ACRs         |                      | Random regions |                      | Two-sided Fisher's exact test ( <i>P</i> ) |
|---------|--------------|----------------------|----------------|----------------------|--------------------------------------------|
|         | in promoters | outside of promoters | in promoters   | outside of promoters |                                            |
| Mouse   | 81,245       | 656,850              | 37,253         | 700,842              | $< 2.2 \times 10^{-16}$                    |
| Chicken | 45,480       | 753,032              | 35,867         | 762,645              | $< 2.2 \times 10^{-16}$                    |
| Medaka  | 53,411       | 393,986              | 32,273         | 415,124              | $< 2.2 \times 10^{-16}$                    |

**Table S5.** Biological reproducibility of whole-embryo ATAC-seq signal intensities.

| Species | Stage    | Pair compared    | Pearson correlation coefficient (r) | T of test for no correlation | P value                 |
|---------|----------|------------------|-------------------------------------|------------------------------|-------------------------|
| Mouse   | E7.5     | Rep. 1 vs Rep. 2 | 0.859                               | 668.907                      | $< 2.2 \times 10^{-16}$ |
|         |          | Rep. 1 vs Rep. 3 | 0.855                               | 658.630                      | $< 2.2 \times 10^{-16}$ |
|         |          | Rep. 2 vs Rep. 3 | 0.905                               | 847.750                      | $< 2.2 \times 10^{-16}$ |
|         | E8.5     | Rep. 1 vs Rep. 2 | 0.903                               | 989.000                      | $< 2.2 \times 10^{-16}$ |
|         |          | Rep. 1 vs Rep. 3 | 0.908                               | 1018.322                     | $< 2.2 \times 10^{-16}$ |
|         |          | Rep. 2 vs Rep. 3 | 0.891                               | 924.761                      | $< 2.2 \times 10^{-16}$ |
|         | E9.5     | Rep. 1 vs Rep. 2 | 0.891                               | 932.351                      | $< 2.2 \times 10^{-16}$ |
|         |          | Rep. 1 vs Rep. 3 | 0.886                               | 907.021                      | $< 2.2 \times 10^{-16}$ |
|         |          | Rep. 2 vs Rep. 3 | 0.901                               | 986.235                      | $< 2.2 \times 10^{-16}$ |
|         | E10.5    | Rep. 1 vs Rep. 2 | 0.909                               | 1052.135                     | $< 2.2 \times 10^{-16}$ |
|         |          | Rep. 1 vs Rep. 3 | 0.898                               | 985.457                      | $< 2.2 \times 10^{-16}$ |
|         |          | Rep. 2 vs Rep. 3 | 0.911                               | 1067.454                     | $< 2.2 \times 10^{-16}$ |
|         | E12.5    | Rep. 1 vs Rep. 2 | 0.897                               | 1028.852                     | $< 2.2 \times 10^{-16}$ |
|         |          | Rep. 1 vs Rep. 3 | 0.901                               | 1053.518                     | $< 2.2 \times 10^{-16}$ |
|         |          | Rep. 2 vs Rep. 3 | 0.891                               | 994.911                      | $< 2.2 \times 10^{-16}$ |
|         | E14.5    | Rep. 1 vs Rep. 2 | 0.900                               | 992.272                      | $< 2.2 \times 10^{-16}$ |
|         |          | Rep. 1 vs Rep. 3 | 0.903                               | 1009.557                     | $< 2.2 \times 10^{-16}$ |
|         |          | Rep. 2 vs Rep. 3 | 0.899                               | 986.149                      | $< 2.2 \times 10^{-16}$ |
|         | E16.5    | Rep. 1 vs Rep. 2 | 0.895                               | 969.709                      | $< 2.2 \times 10^{-16}$ |
|         |          | Rep. 1 vs Rep. 3 | 0.892                               | 953.606                      | $< 2.2 \times 10^{-16}$ |
|         |          | Rep. 2 vs Rep. 3 | 0.898                               | 988.806                      | $< 2.2 \times 10^{-16}$ |
|         | E18.5    | Rep. 1 vs Rep. 2 | 0.846                               | 812.949                      | $< 2.2 \times 10^{-16}$ |
|         |          | Rep. 1 vs Rep. 3 | 0.849                               | 823.157                      | $< 2.2 \times 10^{-16}$ |
|         |          | Rep. 2 vs Rep. 3 | 0.850                               | 829.223                      | $< 2.2 \times 10^{-16}$ |
| Chicken | HH6      | Rep. 1 vs Rep. 2 | 0.884                               | 1023.111                     | $< 2.2 \times 10^{-16}$ |
|         |          | Rep. 1 vs Rep. 3 | 0.881                               | 1005.550                     | $< 2.2 \times 10^{-16}$ |
|         |          | Rep. 2 vs Rep. 3 | 0.883                               | 1018.269                     | $< 2.2 \times 10^{-16}$ |
|         | HH11     | Rep. 1 vs Rep. 2 | 0.912                               | 1208.464                     | $< 2.2 \times 10^{-16}$ |
|         |          | Rep. 1 vs Rep. 3 | 0.899                               | 1120.904                     | $< 2.2 \times 10^{-16}$ |
|         |          | Rep. 2 vs Rep. 3 | 0.899                               | 1118.204                     | $< 2.2 \times 10^{-16}$ |
|         | HH16     | Rep. 1 vs Rep. 2 | 0.923                               | 1320.017                     | $< 2.2 \times 10^{-16}$ |
|         |          | Rep. 1 vs Rep. 3 | 0.924                               | 1329.981                     | $< 2.2 \times 10^{-16}$ |
|         |          | Rep. 2 vs Rep. 3 | 0.924                               | 1325.296                     | $< 2.2 \times 10^{-16}$ |
|         | HH19     | Rep. 1 vs Rep. 2 | 0.927                               | 1379.717                     | $< 2.2 \times 10^{-16}$ |
|         |          | Rep. 1 vs Rep. 3 | 0.926                               | 1368.087                     | $< 2.2 \times 10^{-16}$ |
|         |          | Rep. 2 vs Rep. 3 | 0.930                               | 1410.105                     | $< 2.2 \times 10^{-16}$ |
|         | HH24     | Rep. 1 vs Rep. 2 | 0.912                               | 1274.164                     | $< 2.2 \times 10^{-16}$ |
|         |          | Rep. 1 vs Rep. 3 | 0.901                               | 1191.306                     | $< 2.2 \times 10^{-16}$ |
|         |          | Rep. 2 vs Rep. 3 | 0.911                               | 1267.540                     | $< 2.2 \times 10^{-16}$ |
|         | HH28     | Rep. 1 vs Rep. 2 | 0.906                               | 1251.740                     | $< 2.2 \times 10^{-16}$ |
|         |          | Rep. 1 vs Rep. 3 | 0.908                               | 1270.402                     | $< 2.2 \times 10^{-16}$ |
|         |          | Rep. 2 vs Rep. 3 | 0.906                               | 1253.564                     | $< 2.2 \times 10^{-16}$ |
|         | HH32     | Rep. 1 vs Rep. 2 | 0.910                               | 1308.219                     | $< 2.2 \times 10^{-16}$ |
|         |          | Rep. 1 vs Rep. 3 | 0.908                               | 1288.459                     | $< 2.2 \times 10^{-16}$ |
|         |          | Rep. 2 vs Rep. 3 | 0.906                               | 1273.837                     | $< 2.2 \times 10^{-16}$ |
|         | HH38     | Rep. 1 vs Rep. 2 | 0.897                               | 1121.290                     | $< 2.2 \times 10^{-16}$ |
|         |          | Rep. 1 vs Rep. 3 | 0.899                               | 1134.043                     | $< 2.2 \times 10^{-16}$ |
|         |          | Rep. 2 vs Rep. 3 | 0.903                               | 1158.655                     | $< 2.2 \times 10^{-16}$ |
| Medaka  | Stage 15 | Rep. 1 vs Rep. 2 | 0.906                               | 933.672                      | $< 2.2 \times 10^{-16}$ |
|         |          | Rep. 1 vs Rep. 3 | 0.907                               | 940.531                      | $< 2.2 \times 10^{-16}$ |
|         |          | Rep. 2 vs Rep. 3 | 0.906                               | 935.824                      | $< 2.2 \times 10^{-16}$ |
|         | Stage 21 | Rep. 1 vs Rep. 2 | 0.911                               | 991.763                      | $< 2.2 \times 10^{-16}$ |
|         |          | Rep. 1 vs Rep. 3 | 0.911                               | 987.852                      | $< 2.2 \times 10^{-16}$ |
|         |          | Rep. 2 vs Rep. 3 | 0.909                               | 979.181                      | $< 2.2 \times 10^{-16}$ |
|         | Stage 24 | Rep. 1 vs Rep. 2 | 0.872                               | 825.500                      | $< 2.2 \times 10^{-16}$ |
|         |          | Rep. 1 vs Rep. 3 | 0.874                               | 834.035                      | $< 2.2 \times 10^{-16}$ |
|         |          | Rep. 2 vs Rep. 3 | 0.931                               | 1179.750                     | $< 2.2 \times 10^{-16}$ |
|         | Stage 28 | Rep. 1 vs Rep. 2 | 0.929                               | 1122.782                     | $< 2.2 \times 10^{-16}$ |
|         |          | Rep. 1 vs Rep. 3 | 0.928                               | 1115.674                     | $< 2.2 \times 10^{-16}$ |

|          |                  |       |          |                         |
|----------|------------------|-------|----------|-------------------------|
|          | Rep. 2 vs Rep. 3 | 0.924 | 1081.386 | $< 2.2 \times 10^{-16}$ |
| Stage 32 | Rep. 1 vs Rep. 2 | 0.928 | 1156.388 | $< 2.2 \times 10^{-16}$ |
|          | Rep. 1 vs Rep. 3 | 0.924 | 1117.229 | $< 2.2 \times 10^{-16}$ |
|          | Rep. 2 vs Rep. 3 | 0.915 | 1051.375 | $< 2.2 \times 10^{-16}$ |
| Stage 36 | Rep. 1 vs Rep. 2 | 0.929 | 1157.204 | $< 2.2 \times 10^{-16}$ |
|          | Rep. 1 vs Rep. 3 | 0.935 | 1206.773 | $< 2.2 \times 10^{-16}$ |
|          | Rep. 2 vs Rep. 3 | 0.931 | 1171.902 | $< 2.2 \times 10^{-16}$ |
| Stage 40 | Rep. 1 vs Rep. 2 | 0.898 | 883.883  | $< 2.2 \times 10^{-16}$ |
|          | Rep. 1 vs Rep. 3 | 0.901 | 899.696  | $< 2.2 \times 10^{-16}$ |
|          | Rep. 2 vs Rep. 3 | 0.917 | 993.256  | $< 2.2 \times 10^{-16}$ |

**Table S6.** Information on whole-genome pairwise alignment data.

| Reference species                   | Reference genome version | Query species                                               | Query genome version        | Parameter for axtChain              |
|-------------------------------------|--------------------------|-------------------------------------------------------------|-----------------------------|-------------------------------------|
| Mouse<br>( <i>Mus musculus</i> )    | GRCm38                   | Rat<br>( <i>Rattus norvegicus</i> )                         | Rnor_6.0                    | -minScore=3000<br>-linearGap=medium |
| Mouse<br>( <i>Mus musculus</i> )    | GRCm38                   | Rabbit<br>( <i>Oryctolagus cuniculus</i> )                  | OryCun2.0                   | -minScore=3000<br>-linearGap=medium |
| Mouse<br>( <i>Mus musculus</i> )    | GRCm38                   | Human<br>( <i>Homo sapiens</i> )                            | GRCh38                      | -minScore=3000<br>-linearGap=medium |
| Mouse<br>( <i>Mus musculus</i> )    | GRCm38                   | Cow<br>( <i>Bos taurus</i> )                                | UMD3.1                      | -minScore=5000<br>-linearGap=loose  |
| Mouse<br>( <i>Mus musculus</i> )    | GRCm38                   | Opossum<br>( <i>Monodelphis domestica</i> )                 | monDom5                     | -minScore=5000<br>-linearGap=loose  |
| Mouse<br>( <i>Mus musculus</i> )    | GRCm38                   | Chicken<br>( <i>Gallus gallus</i> )                         | Gallus_gallus-5.0           | -minScore=5000<br>-linearGap=loose  |
| Mouse<br>( <i>Mus musculus</i> )    | GRCm38                   | Western clawed frog<br>( <i>Xenopus tropicalis</i> )        | JGI_4.2                     | -minScore=5000<br>-linearGap=loose  |
| Mouse<br>( <i>Mus musculus</i> )    | GRCm38                   | Coelacanth<br>( <i>Latimeria chalumnae</i> )                | LatCha1                     | -minScore=5000<br>-linearGap=loose  |
| Mouse<br>( <i>Mus musculus</i> )    | GRCm38                   | Spotted gar<br>( <i>Lepisosteus oculatus</i> )              | LepOcu1                     | -minScore=5000<br>-linearGap=loose  |
| Mouse<br>( <i>Mus musculus</i> )    | GRCm38                   | Elephant shark<br>( <i>Callorhynchus milii</i> )            | calMil1                     | -minScore=5000<br>-linearGap=loose  |
| Mouse<br>( <i>Mus musculus</i> )    | GRCm38                   | Lamprey<br>( <i>Petromyzon marinus</i> )                    | Pmarinus_7.0                | -minScore=5000<br>-linearGap=loose  |
| Mouse<br>( <i>Mus musculus</i> )    | GRCm38                   | Vase tunicate<br>( <i>Ciona intestinalis</i> )              | KH                          | -minScore=5000<br>-linearGap=loose  |
| Mouse<br>( <i>Mus musculus</i> )    | GRCm38                   | Amphioxus<br>( <i>Branchiostoma floridae</i> )              | v1.0                        | -minScore=5000<br>-linearGap=loose  |
| Mouse<br>( <i>Mus musculus</i> )    | GRCm38                   | Roundworm<br>( <i>Caenorhabditis elegans</i> )              | WBcel235                    | -minScore=5000<br>-linearGap=loose  |
| Mouse<br>( <i>Mus musculus</i> )    | GRCm38                   | Starlet sea anemone<br>( <i>Nematostella vectensis</i> )    | ASM20922v1                  | -minScore=5000<br>-linearGap=loose  |
| Mouse<br>( <i>Mus musculus</i> )    | GRCm38                   | Choanoflagellate<br>( <i>Salpingoeca rosetta</i> )          | Proterospongia_sp_ATCC50818 | -minScore=5000<br>-linearGap=loose  |
| Chicken<br>( <i>Gallus gallus</i> ) | Gallus_gallus-5.0        | Turkey<br>( <i>Meleagris gallopavo</i> )                    | UMD2                        | -minScore=3000<br>-linearGap=medium |
| Chicken<br>( <i>Gallus gallus</i> ) | Gallus_gallus-5.0        | Zebra finch<br>( <i>Taeniopygia guttata</i> )               | taeGut3.2.4                 | -minScore=3000<br>-linearGap=medium |
| Chicken<br>( <i>Gallus gallus</i> ) | Gallus_gallus-5.0        | American alligator<br>( <i>Alligator mississippiensis</i> ) | ASM28112v4                  | -minScore=5000<br>-linearGap=loose  |
| Chicken<br>( <i>Gallus gallus</i> ) | Gallus_gallus-5.0        | Softshell turtle<br>( <i>Pelodiscus sinensis</i> )          | PelSin_1.0                  | -minScore=5000<br>-linearGap=loose  |
| Chicken<br>( <i>Gallus gallus</i> ) | Gallus_gallus-5.0        | Anole lizard<br>( <i>Anolis carolinensis</i> )              | AnoCar2.0                   | -minScore=5000<br>-linearGap=loose  |
| Chicken<br>( <i>Gallus gallus</i> ) | Gallus_gallus-5.0        | Mouse<br>( <i>Mus musculus</i> )                            | GRCm38                      | -minScore=5000<br>-linearGap=loose  |
| Chicken<br>( <i>Gallus gallus</i> ) | Gallus_gallus-5.0        | Western clawed frog<br>( <i>Xenopus tropicalis</i> )        | JGI_4.2                     | -minScore=5000<br>-linearGap=loose  |
| Chicken<br>( <i>Gallus gallus</i> ) | Gallus_gallus-5.0        | Coelacanth                                                  | LatCha1                     | -minScore=5000                      |

|                            |                   |                                          |              |                   |
|----------------------------|-------------------|------------------------------------------|--------------|-------------------|
| ( <i>Gallus gallus</i> )   |                   | ( <i>Latimeria chalumnae</i> )           |              | -linearGap=loose  |
| Chicken                    |                   | Spotted gar                              |              | -minScore=5000    |
| ( <i>Gallus gallus</i> )   | Gallus_gallus-5.0 | ( <i>Lepisosteus oculatus</i> )          | LepOcu1      | -linearGap=loose  |
| Chicken                    |                   | Elephant shark                           |              | -minScore=5000    |
| ( <i>Gallus gallus</i> )   | Gallus_gallus-5.0 | ( <i>Callorhinchus milii</i> )           | calMil1      | -linearGap=loose  |
| Chicken                    |                   | Lamprey                                  |              | -minScore=5000    |
| ( <i>Gallus gallus</i> )   | Gallus_gallus-5.0 | ( <i>Petromyzon marinus</i> )            | Pmarinus_7.0 | -linearGap=loose  |
| Chicken                    |                   | Vase tunicate                            |              | -minScore=5000    |
| ( <i>Gallus gallus</i> )   | Gallus_gallus-5.0 | ( <i>Ciona intestinalis</i> )            | KH           | -linearGap=loose  |
| Chicken                    |                   | Amphioxus                                |              | -minScore=5000    |
| ( <i>Gallus gallus</i> )   | Gallus_gallus-5.0 | ( <i>Branchiostoma floridae</i> )        | v1.0         | -linearGap=loose  |
| Chicken                    |                   | Roundworm                                |              | -minScore=5000    |
| ( <i>Gallus gallus</i> )   | Gallus_gallus-5.0 | ( <i>Caenorhabditis elegans</i> )        | WBcel235     | -linearGap=loose  |
| Chicken                    |                   | Starlet sea anemone                      |              | -minScore=5000    |
| ( <i>Gallus gallus</i> )   | Gallus_gallus-5.0 | ( <i>Nematostella vectensis</i> )        | ASM20922v1   | -linearGap=loose  |
| Chicken                    |                   | Choanoflagellate                         |              | -minScore=5000    |
| ( <i>Gallus gallus</i> )   | Gallus_gallus-5.0 | ( <i>Salpingoeca rosetta</i> )           | sp_ATCC50818 | -linearGap=loose  |
| Medaka                     |                   | Amazon molly                             |              | -minScore=3000    |
| ( <i>Oryzias latipes</i> ) | HdrR              | ( <i>Poecilia formosa</i> )              | PoeFor_5.1.2 | -linearGap=medium |
| Medaka                     |                   | Tilapia                                  |              | -minScore=3000    |
| ( <i>Oryzias latipes</i> ) | HdrR              | ( <i>Oreochromis niloticus</i> )         | Orenil1.0    | -linearGap=medium |
| Medaka                     |                   | Fugu                                     |              | -minScore=3000    |
| ( <i>Oryzias latipes</i> ) | HdrR              | ( <i>Takifugu rubripes</i> )             | FUGU 4.0     | -linearGap=medium |
| Medaka                     |                   | Mudskipper                               |              | -minScore=3000    |
| ( <i>Oryzias latipes</i> ) | HdrR              | ( <i>Boleophthalmus pectinirostris</i> ) | BP           | -linearGap=medium |
| Medaka                     |                   | Zebrafish                                |              | -minScore=3000    |
| ( <i>Oryzias latipes</i> ) | HdrR              | ( <i>Danio rerio</i> )                   | GRCz10       | -linearGap=medium |
| Medaka                     |                   | Spotted gar                              |              | -minScore=3000    |
| ( <i>Oryzias latipes</i> ) | HdrR              | ( <i>Lepisosteus oculatus</i> )          | LepOcu1      | -linearGap=medium |
| Medaka                     |                   | Coelacanth                               |              | -minScore=5000    |
| ( <i>Oryzias latipes</i> ) | HdrR              | ( <i>Latimeria chalumnae</i> )           | LatCha1      | -linearGap=loose  |
| Medaka                     |                   | Elephant shark                           |              | -minScore=5000    |
| ( <i>Oryzias latipes</i> ) | HdrR              | ( <i>Callorhinchus milii</i> )           | calMil1      | -linearGap=loose  |
| Medaka                     |                   | Lamprey                                  |              | -minScore=5000    |
| ( <i>Oryzias latipes</i> ) | HdrR              | ( <i>Petromyzon marinus</i> )            | Pmarinus_7.0 | -linearGap=loose  |
| Medaka                     |                   | Vase tunicate                            |              | -minScore=5000    |
| ( <i>Oryzias latipes</i> ) | HdrR              | ( <i>Ciona intestinalis</i> )            | KH           | -linearGap=loose  |
| Medaka                     |                   | Amphioxus                                |              | -minScore=5000    |
| ( <i>Oryzias latipes</i> ) | HdrR              | ( <i>Branchiostoma floridae</i> )        | v1.0         | -linearGap=loose  |
| Medaka                     |                   | Roundworm                                |              | -minScore=5000    |
| ( <i>Oryzias latipes</i> ) | HdrR              | ( <i>Caenorhabditis elegans</i> )        | WBcel235     | -linearGap=loose  |
| Medaka                     |                   | Starlet sea anemone                      |              | -minScore=5000    |
| ( <i>Oryzias latipes</i> ) | HdrR              | ( <i>Nematostella vectensis</i> )        | ASM20922v1   | -linearGap=loose  |
| Medaka                     |                   | Choanoflagellate                         |              | -minScore=5000    |
| ( <i>Oryzias latipes</i> ) | HdrR              | ( <i>Salpingoeca rosetta</i> )           | sp_ATCC50818 | -linearGap=loose  |

**Table S7.** Statistical information in Figure 3.

| Species             | Category            | Kruskal–Wallis rank sum test |                    |         |        |        |
|---------------------|---------------------|------------------------------|--------------------|---------|--------|--------|
|                     |                     | Test statistic (H)           | Degrees of freedom | P value | FDR    |        |
| Mouse               | Mouse               | 17.0                         | 7                  | 0.0175  | 0.0191 |        |
|                     | Human               | 17.8                         | 7                  | 0.0128  | 0.0191 |        |
|                     | Cow                 | 16.6                         | 7                  | 0.0204  | 0.0204 |        |
|                     | Opossum             | 18.8                         | 7                  | 0.0088  | 0.0175 |        |
|                     | Chicken             | 20.4                         | 7                  | 0.0047  | 0.0150 |        |
|                     | Western clawed frog | 20.2                         | 7                  | 0.0052  | 0.0150 |        |
|                     | Coelacanth          | 20.4                         | 7                  | 0.0048  | 0.0150 |        |
|                     | Spotted gar         | 18.1                         | 7                  | 0.0113  | 0.0191 |        |
|                     | Elephant shark      | 19.7                         | 7                  | 0.0063  | 0.0150 |        |
|                     | Lamprey             | 17.4                         | 7                  | 0.0150  | 0.0191 |        |
|                     | Vase tunicate       | 17.1                         | 7                  | 0.0170  | 0.0191 |        |
|                     | Amphioxus           | 20.7                         | 7                  | 0.0043  | 0.0150 |        |
|                     | Chicken             | Chicken                      | 18.2               | 7       | 0.0110 | 0.0130 |
|                     |                     | Turkey                       | 14.5               | 7       | 0.0429 | 0.0429 |
| American alligator  |                     | 21.7                         | 7                  | 0.0029  | 0.0054 |        |
| Softshell turtle    |                     | 20.8                         | 7                  | 0.0041  | 0.0067 |        |
| Anole lizard        |                     | 21.7                         | 7                  | 0.0028  | 0.0054 |        |
| Mouse               |                     | 22.3                         | 7                  | 0.0023  | 0.0054 |        |
| Western clawed frog |                     | 22.0                         | 7                  | 0.0026  | 0.0054 |        |
| Coelacanth          |                     | 21.7                         | 7                  | 0.0029  | 0.0054 |        |
| Spotted gar         |                     | 22.0                         | 7                  | 0.0025  | 0.0054 |        |
| Elephant shark      |                     | 21.9                         | 7                  | 0.0027  | 0.0054 |        |
| Lamprey             |                     | 17.4                         | 7                  | 0.0149  | 0.0161 |        |
| Vase tunicate       |                     | 19.1                         | 7                  | 0.0079  | 0.0103 |        |
| Amphioxus           |                     | 19.6                         | 7                  | 0.0065  | 0.0094 |        |
| Medaka              |                     | Medaka                       | 16.7               | 6       | 0.0105 | 0.0144 |
|                     | Amazon molly        | 18                           | 6                  | 0.0063  | 0.0124 |        |
|                     | Tilapia             | 17.8                         | 6                  | 0.0068  | 0.0124 |        |
|                     | Fugu                | 17.4                         | 6                  | 0.0079  | 0.0124 |        |
|                     | Zebrafish           | 16                           | 6                  | 0.0139  | 0.0170 |        |
|                     | Spotted gar         | 14.5                         | 6                  | 0.0244  | 0.0268 |        |
|                     | Coelacanth          | 17.7                         | 6                  | 0.0070  | 0.0124 |        |
|                     | Elephant shark      | 19.6                         | 6                  | 0.0032  | 0.0124 |        |
|                     | Lamprey             | 18                           | 6                  | 0.0062  | 0.0124 |        |
|                     | Vase tunicate       | 8.85                         | 6                  | 0.1820  | 0.1820 |        |
| Amphioxus           | 19.6                | 6                            | 0.0032             | 0.0124  |        |        |

**Table S8.** Statistical information in Figure 4.

| Species             | Category            | Kruskal–Wallis rank sum test |                    |         |        |        |
|---------------------|---------------------|------------------------------|--------------------|---------|--------|--------|
|                     |                     | Test statistic (H)           | Degrees of freedom | P value | FDR    |        |
| Mouse               | Mouse               | 36.7                         | 16                 | 0.0023  | 0.0252 |        |
|                     | Human               | 24.3                         | 16                 | 0.0836  | 0.0912 |        |
|                     | Cow                 | 28.2                         | 16                 | 0.0302  | 0.0497 |        |
|                     | Opossum             | 27.2                         | 16                 | 0.0390  | 0.0520 |        |
|                     | Chicken             | 27.8                         | 16                 | 0.0331  | 0.0497 |        |
|                     | Western clawed frog | 25.5                         | 16                 | 0.0622  | 0.0746 |        |
|                     | Coelacanth          | 33.5                         | 16                 | 0.0063  | 0.0252 |        |
|                     | Spotted gar         | 32.2                         | 16                 | 0.0094  | 0.0282 |        |
|                     | Elephant shark      | 30.3                         | 16                 | 0.0165  | 0.0396 |        |
|                     | Lamprey             | 19.8                         | 16                 | 0.2300  | 0.2300 |        |
|                     | Vase tunicate       | 29.1                         | 16                 | 0.0234  | 0.0468 |        |
|                     | Amphioxus           | 33.7                         | 16                 | 0.0059  | 0.0252 |        |
|                     | Chicken             | Chicken                      | 15.6               | 12      | 0.2110 | 0.2286 |
|                     |                     | Turkey                       | 22.4               | 12      | 0.0333 | 0.1092 |
| American alligator  |                     | 21.6                         | 12                 | 0.0420  | 0.1092 |        |
| Softshell turtle    |                     | 23.0                         | 12                 | 0.0278  | 0.1092 |        |
| Anole lizard        |                     | 22.1                         | 12                 | 0.0366  | 0.1092 |        |
| Mouse               |                     | 16.5                         | 12                 | 0.1680  | 0.2184 |        |
| Western clawed frog |                     | 15.8                         | 12                 | 0.2000  | 0.2286 |        |
| Coelacanth          |                     | 19.4                         | 12                 | 0.0793  | 0.1289 |        |
| Spotted gar         |                     | 20.2                         | 12                 | 0.0630  | 0.1289 |        |
| Elephant shark      |                     | 22.5                         | 12                 | 0.0320  | 0.1092 |        |
| Lamprey             |                     | 12.2                         | 12                 | 0.4320  | 0.4320 |        |
| Vase tunicate       |                     | 19.7                         | 12                 | 0.0738  | 0.1289 |        |
| Amphioxus           |                     | 18.0                         | 12                 | 0.1160  | 0.1676 |        |
| Medaka              |                     | Medaka                       | 20.8               | 15      | 0.1440 | 0.1760 |
|                     | Amazon molly        | 30.1                         | 15                 | 0.0117  | 0.0429 |        |
|                     | Tilapia             | 21.5                         | 15                 | 0.1220  | 0.1678 |        |
|                     | Fugu                | 22.7                         | 15                 | 0.0897  | 0.1645 |        |
|                     | Zebrafish           | 21.5                         | 15                 | 0.1200  | 0.1678 |        |
|                     | Spotted gar         | 18.3                         | 15                 | 0.2450  | 0.2450 |        |
|                     | Coelacanth          | 27.7                         | 15                 | 0.0237  | 0.0652 |        |
|                     | Elephant shark      | 43.1                         | 15                 | 0.0001  | 0.0011 |        |
|                     | Lamprey             | 25.2                         | 15                 | 0.0476  | 0.1047 |        |
|                     | Vase tunicate       | 19.9                         | 15                 | 0.1760  | 0.1936 |        |
|                     | Amphioxus           | 31.7                         | 15                 | 0.0072  | 0.0396 |        |



**Table S9.** Detailed information on representative enhancers from the VISTA Enhancer Database.

| <b>Enhancer ID</b> | <b>Genomic position (GRCm38)</b> | <b>Flanking genes</b>                          | <b>Expression pattern</b>                                                                               |
|--------------------|----------------------------------|------------------------------------------------|---------------------------------------------------------------------------------------------------------|
| mm3                | 12:111142738–111143613           | <i>Rcor1</i> ;<br><i>Traf3</i>                 | neuraltube[4/4];<br>hindbrain(rhombencephalon)[4/4];<br>forebrain[4/4]                                  |
| mm7                | 14:61004739–61005741             | <i>Tnfrsf19</i>                                | forebrain[6/6]                                                                                          |
| mm9                | 8:46770571–46772246              | <i>Irf2</i>                                    | eye[3/4]                                                                                                |
| mm109              | 18:56896918–56898991             | <i>March3</i>                                  | heart[3/11]                                                                                             |
| mm257              | 18:75502363–75503667             | <i>Ctif</i>                                    | midbrain(mesencephalon)[6/8];<br>heart[8/8]                                                             |
| mm303              | 9:103679109–103679657            | <i>4932413F04Rik</i> ;<br><i>Nphp3</i>         | heart[3/6]                                                                                              |
| mm324              | 19:47908459–47910596             | <i>Itpr1p</i>                                  | nose[4/11]                                                                                              |
| mm394              | 5:24730554–24731843              | <i>Wdr86</i> ;<br><i>Crygn</i>                 | midbrain(mesencephalon)[6/11];<br>eye[5/11]                                                             |
| mm422              | 2:4556144–4557875                | <i>Frm4a</i>                                   | forebrain[4/7];<br>limb[4/7]                                                                            |
| mm515              | 2:75422202–75424576              | <i>Mtx2</i> ;<br><i>9430019J16Rik</i>          | neuraltube[4/7];<br>hindbrain(rhombencephalon)[5/7];<br>forebrain[4/7];<br>limb[5/7]                    |
| mm622              | 5:111601262–111602739            | <i>C130026L21Rik</i> ;<br><i>E130006D01Rik</i> | branchialarch[9/11]                                                                                     |
| mm790              | 1:127554365–127556879            | <i>Tmem163</i>                                 | neuraltube[3/3];<br>hindbrain(rhombencephalon)[3/3];<br>midbrain(mesencephalon)[3/3];<br>forebrain[3/3] |

**Table S10.** Statistical information in Figure S7.

| Species             | Category            | Kruskal–Wallis rank sum test |                    |         |        |        |
|---------------------|---------------------|------------------------------|--------------------|---------|--------|--------|
|                     |                     | Test statistic (H)           | Degrees of freedom | P value | FDR    |        |
| Mouse               | Mouse               | 36.7                         | 16                 | 0.0023  | 0.0275 |        |
|                     | Human               | 24.8                         | 16                 | 0.0743  | 0.0991 |        |
|                     | Cow                 | 30.4                         | 16                 | 0.0160  | 0.0410 |        |
|                     | Opossum             | 29.5                         | 16                 | 0.0206  | 0.0412 |        |
|                     | Chicken             | 27.8                         | 16                 | 0.0331  | 0.0567 |        |
|                     | Western clawed frog | 23.6                         | 16                 | 0.0989  | 0.1187 |        |
|                     | Coelacanth          | 34.3                         | 16                 | 0.0050  | 0.0298 |        |
|                     | Spotted gar         | 20.8                         | 16                 | 0.1870  | 0.2040 |        |
|                     | Elephant shark      | 27.3                         | 16                 | 0.0384  | 0.0576 |        |
|                     | Lamprey             | 14.9                         | 16                 | 0.5320  | 0.5320 |        |
|                     | Vase tunicate       | 30.2                         | 16                 | 0.0171  | 0.0410 |        |
|                     | Amphioxus           | 32.5                         | 16                 | 0.0087  | 0.0348 |        |
|                     | Chicken             | Chicken                      | 15.5               | 12      | 0.2160 | 0.2470 |
|                     |                     | Turkey                       | 22.2               | 12      | 0.0349 | 0.1144 |
| American alligator  |                     | 21.6                         | 12                 | 0.0420  | 0.1144 |        |
| Softshell turtle    |                     | 22.1                         | 12                 | 0.0366  | 0.1144 |        |
| Anole lizard        |                     | 20.3                         | 12                 | 0.0618  | 0.1144 |        |
| Mouse               |                     | 14.9                         | 12                 | 0.2470  | 0.2470 |        |
| Western clawed frog |                     | 21.2                         | 12                 | 0.0471  | 0.1144 |        |
| Coelacanth          |                     | 18.3                         | 12                 | 0.1080  | 0.1560 |        |
| Spotted gar         |                     | 19.8                         | 12                 | 0.0704  | 0.1144 |        |
| Elephant shark      |                     | 19.9                         | 12                 | 0.0687  | 0.1144 |        |
| Lamprey             |                     | 14.9                         | 12                 | 0.2460  | 0.2470 |        |
| Vase tunicate       |                     | 20.4                         | 12                 | 0.0603  | 0.1144 |        |
| Amphioxus           |                     | 16.5                         | 12                 | 0.1680  | 0.2184 |        |
| Medaka              |                     | Medaka                       | 18.9               | 15      | 0.2170 | 0.2170 |
|                     | Amazon molly        | 27.4                         | 15                 | 0.0257  | 0.0707 |        |
|                     | Tilapia             | 23.8                         | 15                 | 0.0691  | 0.1267 |        |
|                     | Fugu                | 21.5                         | 15                 | 0.1220  | 0.1678 |        |
|                     | Zebrafish           | 19.1                         | 15                 | 0.2110  | 0.2170 |        |
|                     | Spotted gar         | 22                           | 15                 | 0.1080  | 0.1678 |        |
|                     | Coelacanth          | 20.9                         | 15                 | 0.1390  | 0.1699 |        |
|                     | Elephant shark      | 43.7                         | 15                 | 0.0001  | 0.0013 |        |
|                     | Lamprey             | 24.7                         | 15                 | 0.0535  | 0.1177 |        |
|                     | Vase tunicate       | 32.1                         | 15                 | 0.0063  | 0.0231 |        |
|                     | Amphioxus           | 32.3                         | 15                 | 0.0059  | 0.0231 |        |

**Table S11.** Statistical information in Figure S8a.

|                     |                     | <b>Kruskal–Wallis rank sum test</b> |                           |                |            |        |
|---------------------|---------------------|-------------------------------------|---------------------------|----------------|------------|--------|
| <b>Species</b>      | <b>Category</b>     | <b>Test statistic (H)</b>           | <b>Degrees of freedom</b> | <b>P value</b> | <b>FDR</b> |        |
| Mouse               | Mouse               | 17.0                                | 7                         | 0.0175         | 0.0210     |        |
|                     | Human               | 17.9                                | 7                         | 0.0124         | 0.0201     |        |
|                     | Cow                 | 16.6                                | 7                         | 0.0022         | 0.0178     |        |
|                     | Opossum             | 19.3                                | 7                         | 0.0074         | 0.0178     |        |
|                     | Chicken             | 19.4                                | 7                         | 0.0071         | 0.0178     |        |
|                     | Western clawed frog | 15.1                                | 7                         | 0.0350         | 0.0382     |        |
|                     | Coelacanth          | 19.8                                | 7                         | 0.0060         | 0.0178     |        |
|                     | Spotted gar         | 12.5                                | 7                         | 0.0847         | 0.0847     |        |
|                     | Elephant shark      | 18.6                                | 7                         | 0.0097         | 0.0194     |        |
|                     | Lamprey             | 17.4                                | 7                         | 0.0151         | 0.0201     |        |
|                     | Vase tunicate       | 17.5                                | 7                         | 0.0147         | 0.0201     |        |
|                     | Amphioxus           | 20.6                                | 7                         | 0.0043         | 0.0178     |        |
|                     | Chicken             | Chicken                             | 19.8                      | 7              | 0.0061     | 0.0079 |
|                     |                     | Turkey                              | 19.0                      | 7              | 0.0082     | 0.0089 |
| American alligator  |                     | 22.0                                | 7                         | 0.0026         | 0.0055     |        |
| Softshell turtle    |                     | 21.3                                | 7                         | 0.0034         | 0.0055     |        |
| Anole lizard        |                     | 21.4                                | 7                         | 0.0033         | 0.0055     |        |
| Mouse               |                     | 21.3                                | 7                         | 0.0034         | 0.0055     |        |
| Western clawed frog |                     | 21.2                                | 7                         | 0.0035         | 0.0055     |        |
| Coelacanth          |                     | 21.6                                | 7                         | 0.0029         | 0.0055     |        |
| Spotted gar         |                     | 21.2                                | 7                         | 0.0035         | 0.0055     |        |
| Elephant shark      |                     | 22.2                                | 7                         | 0.0024         | 0.0055     |        |
| Lamprey             |                     | 17.5                                | 7                         | 0.0143         | 0.0143     |        |
| Vase tunicate       |                     | 19.1                                | 7                         | 0.0077         | 0.0089     |        |
| Amphioxus           |                     | 21.0                                | 7                         | 0.0038         | 0.0055     |        |
| Medaka              |                     | Medaka                              | 17.3                      | 6              | 0.0083     | 0.0156 |
|                     | Amazon molly        | 16.8                                | 6                         | 0.0099         | 0.0156     |        |
|                     | Tilapia             | 17.5                                | 6                         | 0.0075         | 0.0156     |        |
|                     | Fugu                | 17.1                                | 6                         | 0.0088         | 0.0156     |        |
|                     | Zebrafish           | 15.7                                | 6                         | 0.0154         | 0.0212     |        |
|                     | Spotted gar         | 14                                  | 6                         | 0.0297         | 0.0363     |        |
|                     | Coelacanth          | 19.5                                | 6                         | 0.0034         | 0.0136     |        |
|                     | Elephant shark      | 19.6                                | 6                         | 0.0032         | 0.0136     |        |
|                     | Lamprey             | 9.85                                | 6                         | 0.1310         | 0.1441     |        |
|                     | Vase tunicate       | 8.76                                | 6                         | 0.1870         | 0.1870     |        |
|                     | Amphioxus           | 19.3                                | 6                         | 0.0037         | 0.0136     |        |

**Table S12.** Statistical information in Figure S8b.

| Species             | Category            | Kruskal–Wallis rank sum test |                    |         |        |        |
|---------------------|---------------------|------------------------------|--------------------|---------|--------|--------|
|                     |                     | Test statistic (H)           | Degrees of freedom | P value | FDR    |        |
| Mouse               | Mouse               | 17.1                         | 7                  | 0.0167  | 0.0182 |        |
|                     | Human               | 17.1                         | 7                  | 0.0167  | 0.0182 |        |
|                     | Cow                 | 17.1                         | 7                  | 0.0167  | 0.0182 |        |
|                     | Opossum             | 18.5                         | 7                  | 0.0099  | 0.0164 |        |
|                     | Chicken             | 20.2                         | 7                  | 0.0051  | 0.0146 |        |
|                     | Western clawed frog | 18.5                         | 7                  | 0.0100  | 0.0164 |        |
|                     | Coelacanth          | 20.2                         | 7                  | 0.0051  | 0.0146 |        |
|                     | Spotted gar         | 20.2                         | 7                  | 0.0051  | 0.0146 |        |
|                     | Elephant shark      | 19.7                         | 7                  | 0.0061  | 0.0146 |        |
|                     | Lamprey             | 18.3                         | 7                  | 0.0109  | 0.0164 |        |
|                     | Vase tunicate       | 15.6                         | 7                  | 0.0286  | 0.0286 |        |
|                     | Amphioxus           | 20.9                         | 7                  | 0.0039  | 0.0146 |        |
|                     | Chicken             | Chicken                      | 18.8               | 7       | 0.0087 | 0.0126 |
|                     |                     | Turkey                       | 17.7               | 7       | 0.0136 | 0.0153 |
| American alligator  |                     | 22.7                         | 7                  | 0.0019  | 0.0056 |        |
| Softshell turtle    |                     | 20.5                         | 7                  | 0.0046  | 0.0075 |        |
| Anole lizard        |                     | 21.7                         | 7                  | 0.0029  | 0.0056 |        |
| Mouse               |                     | 22.4                         | 7                  | 0.0022  | 0.0056 |        |
| Western clawed frog |                     | 21.6                         | 7                  | 0.0030  | 0.0056 |        |
| Coelacanth          |                     | 21.9                         | 7                  | 0.0026  | 0.0056 |        |
| Spotted gar         |                     | 21.6                         | 7                  | 0.0030  | 0.0056 |        |
| Elephant shark      |                     | 21.7                         | 7                  | 0.0028  | 0.0056 |        |
| Lamprey             |                     | 17.6                         | 7                  | 0.0141  | 0.0153 |        |
| Vase tunicate       |                     | 18.3                         | 7                  | 0.0108  | 0.0140 |        |
| Amphioxus           |                     | 17.3                         | 7                  | 0.0154  | 0.0154 |        |
| Medaka              |                     | Medaka                       | 17.2               | 6       | 0.0087 | 0.0131 |
|                     | Amazon molly        | 16.4                         | 6                  | 0.0119  | 0.0131 |        |
|                     | Tilapia             | 18.1                         | 6                  | 0.0059  | 0.0131 |        |
|                     | Fugu                | 17.2                         | 6                  | 0.0087  | 0.0131 |        |
|                     | Zebrafish           | 16.5                         | 6                  | 0.0112  | 0.0131 |        |
|                     | Spotted gar         | 13.7                         | 6                  | 0.0334  | 0.0334 |        |
|                     | Coelacanth          | 16.7                         | 6                  | 0.0106  | 0.0131 |        |
|                     | Elephant shark      | 19.6                         | 6                  | 0.0032  | 0.0131 |        |
|                     | Lamprey             | 17.6                         | 6                  | 0.0072  | 0.0131 |        |
|                     | Vase tunicate       | 19                           | 6                  | 0.0041  | 0.0131 |        |
|                     | Amphioxus           | 19.6                         | 6                  | 0.0032  | 0.0131 |        |

**Table S13.** Statistical information in Figure S8c.

| Species             | Category            | Kruskal–Wallis rank sum test |                    |         |        |        |
|---------------------|---------------------|------------------------------|--------------------|---------|--------|--------|
|                     |                     | Test statistic (H)           | Degrees of freedom | P value | FDR    |        |
| Mouse               | Mouse               | 17.4                         | 7                  | 0.0150  | 0.0200 |        |
|                     | Human               | 17.4                         | 7                  | 0.0148  | 0.0200 |        |
|                     | Cow                 | 16.6                         | 7                  | 0.0204  | 0.0245 |        |
|                     | Opossum             | 18.5                         | 7                  | 0.0098  | 0.0200 |        |
|                     | Chicken             | 18.9                         | 7                  | 0.0086  | 0.0200 |        |
|                     | Western clawed frog | 20.5                         | 7                  | 0.0047  | 0.0200 |        |
|                     | Coelacanth          | 19.6                         | 7                  | 0.0066  | 0.0200 |        |
|                     | Spotted gar         | 13.1                         | 7                  | 0.0705  | 0.0705 |        |
|                     | Elephant shark      | 17.8                         | 7                  | 0.0130  | 0.0200 |        |
|                     | Lamprey             | 18.3                         | 7                  | 0.0109  | 0.0200 |        |
|                     | Vase tunicate       | 16.1                         | 7                  | 0.0243  | 0.0265 |        |
|                     | Amphioxus           | 19.9                         | 7                  | 0.0058  | 0.0200 |        |
|                     | Chicken             | Chicken                      | 20.2               | 7       | 0.0052 | 0.0068 |
|                     |                     | Turkey                       | 18.8               | 7       | 0.0087 | 0.0094 |
| American alligator  |                     | 22.7                         | 7                  | 0.0019  | 0.0062 |        |
| Softshell turtle    |                     | 20.7                         | 7                  | 0.0043  | 0.0062 |        |
| Anole lizard        |                     | 21.1                         | 7                  | 0.0036  | 0.0062 |        |
| Mouse               |                     | 21.5                         | 7                  | 0.0031  | 0.0062 |        |
| Western clawed frog |                     | 21.1                         | 7                  | 0.0036  | 0.0062 |        |
| Coelacanth          |                     | 21.4                         | 7                  | 0.0033  | 0.0062 |        |
| Spotted gar         |                     | 21.8                         | 7                  | 0.0028  | 0.0062 |        |
| Elephant shark      |                     | 22.0                         | 7                  | 0.0025  | 0.0062 |        |
| Lamprey             |                     | 18.0                         | 7                  | 0.0121  | 0.0121 |        |
| Vase tunicate       |                     | 19.0                         | 7                  | 0.0081  | 0.0094 |        |
| Amphioxus           |                     | 20.7                         | 7                  | 0.0042  | 0.0062 |        |
| Medaka              |                     | Medaka                       | 17.7               | 6       | 0.0069 | 0.0150 |
|                     | Amazon molly        | 16.4                         | 6                  | 0.0117  | 0.0169 |        |
|                     | Tilapia             | 17.7                         | 6                  | 0.0071  | 0.0150 |        |
|                     | Fugu                | 17.3                         | 6                  | 0.0082  | 0.0150 |        |
|                     | Zebrafish           | 16.3                         | 6                  | 0.0123  | 0.0169 |        |
|                     | Spotted gar         | 15                           | 6                  | 0.0206  | 0.0252 |        |
|                     | Coelacanth          | 19.6                         | 6                  | 0.0032  | 0.0143 |        |
|                     | Elephant shark      | 19.4                         | 6                  | 0.0036  | 0.0143 |        |
|                     | Lamprey             | 10.6                         | 6                  | 0.1030  | 0.1133 |        |
|                     | Vase tunicate       | 8.81                         | 6                  | 0.1840  | 0.1840 |        |
|                     | Amphioxus           | 19.1                         | 6                  | 0.0039  | 0.0143 |        |

**Table S14.** Statistical information in Figure S9.

| Species             | Category            | Kruskal–Wallis rank sum test |                    |         |        |        |
|---------------------|---------------------|------------------------------|--------------------|---------|--------|--------|
|                     |                     | Test statistic (H)           | Degrees of freedom | P value | FDR    |        |
| Mouse               | Mouse               | 22.3                         | 7                  | 0.0023  | 0.0119 |        |
|                     | Rat                 | 17.7                         | 7                  | 0.0136  | 0.0193 |        |
|                     | Rabbit              | 16.2                         | 7                  | 0.0236  | 0.0267 |        |
|                     | Human               | 14.3                         | 7                  | 0.0464  | 0.0464 |        |
|                     | Cow                 | 16.3                         | 7                  | 0.0225  | 0.0267 |        |
|                     | Opossum             | 19.5                         | 7                  | 0.0067  | 0.0121 |        |
|                     | Chicken             | 21.4                         | 7                  | 0.0032  | 0.0119 |        |
|                     | Western clawed frog | 20.8                         | 7                  | 0.0041  | 0.0119 |        |
|                     | Coelacanth          | 21.3                         | 7                  | 0.0034  | 0.0119 |        |
|                     | Spotted gar         | 19.0                         | 7                  | 0.0082  | 0.0127 |        |
|                     | Elephant shark      | 20.7                         | 7                  | 0.0042  | 0.0119 |        |
|                     | Lamprey             | 16.4                         | 7                  | 0.0220  | 0.0267 |        |
|                     | Vase tunicate       | 15.7                         | 7                  | 0.0285  | 0.0303 |        |
|                     | Amphioxus           | 19.4                         | 7                  | 0.0071  | 0.0121 |        |
|                     | Roundworm           | 19.6                         | 7                  | 0.0064  | 0.0121 |        |
|                     | Starlet sea anemone | 19.9                         | 7                  | 0.0058  | 0.0121 |        |
|                     | Choanoflagellates   | 21.7                         | 7                  | 0.0029  | 0.0119 |        |
|                     | Chicken             | Chicken                      | 18.4               | 7       | 0.0101 | 0.0114 |
|                     |                     | Turkey                       | 20.4               | 7       | 0.0048 | 0.0077 |
| Zebra finch         |                     | 12.3                         | 7                  | 0.0909  | 0.0909 |        |
| American alligator  |                     | 20.9                         | 7                  | 0.0039  | 0.0077 |        |
| Softshell turtle    |                     | 21.3                         | 7                  | 0.0033  | 0.0077 |        |
| Anole lizard        |                     | 21.5                         | 7                  | 0.0031  | 0.0077 |        |
| Mouse               |                     | 22.1                         | 7                  | 0.0024  | 0.0077 |        |
| Western clawed frog |                     | 22.5                         | 7                  | 0.0021  | 0.0077 |        |
| Coelacanth          |                     | 21.9                         | 7                  | 0.0027  | 0.0077 |        |
| Spotted gar         |                     | 21.5                         | 7                  | 0.0031  | 0.0077 |        |
| Elephant shark      |                     | 22.1                         | 7                  | 0.0024  | 0.0077 |        |
| Lamprey             |                     | 17.5                         | 7                  | 0.0147  | 0.0156 |        |
| Vase tunicate       |                     | 18.6                         | 7                  | 0.0096  | 0.0114 |        |
| Amphioxus           |                     | 20.1                         | 7                  | 0.0054  | 0.0077 |        |
| Roundworm           |                     | 20.5                         | 7                  | 0.0046  | 0.0077 |        |
| Starlet sea anemone |                     | 18.9                         | 7                  | 0.0084  | 0.0110 |        |
| Choanoflagellates   |                     | 20.3                         | 7                  | 0.0050  | 0.0077 |        |
| Medaka              |                     | Medaka                       | 16.7               | 6       | 0.0103 | 0.0129 |
|                     |                     | Amazon molly                 | 18.0               | 6       | 0.0063 | 0.0102 |
|                     | Tilapia             | 17.5                         | 6                  | 0.0075  | 0.0102 |        |
|                     | Fugu                | 17.7                         | 6                  | 0.0070  | 0.0102 |        |
|                     | Mudskipper          | 17.6                         | 6                  | 0.0074  | 0.0102 |        |
|                     | Zebrafish           | 15.1                         | 6                  | 0.0198  | 0.0228 |        |
|                     | Spotted gar         | 14.0                         | 6                  | 0.0295  | 0.0295 |        |
|                     | Coelacanth          | 17.9                         | 6                  | 0.0065  | 0.0102 |        |
|                     | Elephant shark      | 19.6                         | 6                  | 0.0032  | 0.0102 |        |
|                     | Lamprey             | 17.6                         | 6                  | 0.0072  | 0.0102 |        |
|                     | Vase tunicate       | 14.5                         | 6                  | 0.0244  | 0.0261 |        |
|                     | Amphioxus           | 19.6                         | 6                  | 0.0032  | 0.0102 |        |
|                     | Roundworm           | 17.7                         | 6                  | 0.0069  | 0.0102 |        |
|                     | Starlet sea anemone | 19.2                         | 6                  | 0.0039  | 0.0102 |        |
|                     | Choanoflagellates   | 19.4                         | 6                  | 0.0036  | 0.0102 |        |

**Table S15.** Statistical information in Figure S10a.

| Species             | Category            | Kruskal–Wallis rank sum test |                    |         |        |        |
|---------------------|---------------------|------------------------------|--------------------|---------|--------|--------|
|                     |                     | Test statistic (H)           | Degrees of freedom | P value | FDR    |        |
| Mouse               | Mouse               | 21.0                         | 7                  | 0.0038  | 0.0062 |        |
|                     | Human               | 15.9                         | 7                  | 0.0262  | 0.0314 |        |
|                     | Cow                 | 16.3                         | 7                  | 0.0227  | 0.0303 |        |
|                     | Opossum             | 20.8                         | 7                  | 0.0041  | 0.0062 |        |
|                     | Chicken             | 22.2                         | 7                  | 0.0024  | 0.0062 |        |
|                     | Western clawed frog | 21.6                         | 7                  | 0.0030  | 0.0062 |        |
|                     | Coelacanth          | 22.0                         | 7                  | 0.0026  | 0.0062 |        |
|                     | Spotted gar         | 21.2                         | 7                  | 0.0035  | 0.0062 |        |
|                     | Elephant shark      | 22.3                         | 7                  | 0.0022  | 0.0062 |        |
|                     | Lamprey             | 15.2                         | 7                  | 0.0335  | 0.0335 |        |
|                     | Vase tunicate       | 15.4                         | 7                  | 0.0314  | 0.0335 |        |
|                     | Amphioxus           | 21.9                         | 7                  | 0.0026  | 0.0062 |        |
|                     | Chicken             | Chicken                      | 16.5               | 7       | 0.0213 | 0.0231 |
|                     |                     | Turkey                       | 13.7               | 7       | 0.0561 | 0.0561 |
| American alligator  |                     | 21.7                         | 7                  | 0.0029  | 0.0054 |        |
| Softshell turtle    |                     | 20.8                         | 7                  | 0.0041  | 0.0067 |        |
| Anole lizard        |                     | 21.7                         | 7                  | 0.0028  | 0.0054 |        |
| Mouse               |                     | 22.2                         | 7                  | 0.0024  | 0.0054 |        |
| Western clawed frog |                     | 22.1                         | 7                  | 0.0025  | 0.0054 |        |
| Coelacanth          |                     | 21.7                         | 7                  | 0.0029  | 0.0054 |        |
| Spotted gar         |                     | 22.0                         | 7                  | 0.0026  | 0.0054 |        |
| Elephant shark      |                     | 21.8                         | 7                  | 0.0028  | 0.0054 |        |
| Lamprey             |                     | 18.2                         | 7                  | 0.0112  | 0.0146 |        |
| Vase tunicate       |                     | 19.1                         | 7                  | 0.0079  | 0.0114 |        |
| Amphioxus           |                     | 16.6                         | 7                  | 0.0200  | 0.0231 |        |
| Medaka              |                     | Medaka                       | 18.4               | 6       | 0.0054 | 0.0074 |
|                     | Amazon molly        | 19.3                         | 6                  | 0.0037  | 0.0074 |        |
|                     | Tilapia             | 19.1                         | 6                  | 0.0040  | 0.0074 |        |
|                     | Fugu                | 18.6                         | 6                  | 0.0049  | 0.0074 |        |
|                     | Zebrafish           | 17.7                         | 6                  | 0.0069  | 0.0084 |        |
|                     | Spotted gar         | 17.0                         | 6                  | 0.0095  | 0.0105 |        |
|                     | Coelacanth          | 19.3                         | 6                  | 0.0037  | 0.0074 |        |
|                     | Elephant shark      | 19.4                         | 6                  | 0.0036  | 0.0074 |        |
|                     | Lamprey             | 18.7                         | 6                  | 0.0048  | 0.0074 |        |
|                     | Vase tunicate       | 10.2                         | 6                  | 0.1170  | 0.1170 |        |
|                     | Amphioxus           | 19.1                         | 6                  | 0.0039  | 0.0074 |        |

**Table S16.** Statistical information in Figure S10b.

| Species             | Category            | Kruskal–Wallis rank sum test |                    |         |        |        |
|---------------------|---------------------|------------------------------|--------------------|---------|--------|--------|
|                     |                     | Test statistic (H)           | Degrees of freedom | P value | FDR    |        |
| Mouse               | Mouse               | 22.0                         | 7                  | 0.0026  | 0.0048 |        |
|                     | Human               | 18.1                         | 7                  | 0.0114  | 0.0152 |        |
|                     | Cow                 | 17.5                         | 7                  | 0.0145  | 0.0174 |        |
|                     | Opossum             | 21.3                         | 7                  | 0.0033  | 0.0050 |        |
|                     | Chicken             | 22.4                         | 7                  | 0.0021  | 0.0048 |        |
|                     | Western clawed frog | 21.9                         | 7                  | 0.0027  | 0.0048 |        |
|                     | Coelacanth          | 21.9                         | 7                  | 0.0026  | 0.0048 |        |
|                     | Spotted gar         | 21.8                         | 7                  | 0.0028  | 0.0048 |        |
|                     | Elephant shark      | 22.1                         | 7                  | 0.0024  | 0.0048 |        |
|                     | Lamprey             | 15.5                         | 7                  | 0.0305  | 0.0305 |        |
|                     | Vase tunicate       | 15.8                         | 7                  | 0.0270  | 0.0295 |        |
|                     | Amphioxus           | 22.4                         | 7                  | 0.0022  | 0.0048 |        |
|                     | Chicken             | Chicken                      | 20.1               | 7       | 0.0055 | 0.0065 |
|                     |                     | Turkey                       | 21.7               | 7       | 0.0028 | 0.0046 |
| American alligator  |                     | 22.5                         | 7                  | 0.0021  | 0.0046 |        |
| Softshell turtle    |                     | 22.0                         | 7                  | 0.0025  | 0.0046 |        |
| Anole lizard        |                     | 22.4                         | 7                  | 0.0021  | 0.0046 |        |
| Mouse               |                     | 22.6                         | 7                  | 0.0020  | 0.0046 |        |
| Western clawed frog |                     | 22.7                         | 7                  | 0.0019  | 0.0046 |        |
| Coelacanth          |                     | 22.0                         | 7                  | 0.0025  | 0.0046 |        |
| Spotted gar         |                     | 21.5                         | 7                  | 0.0032  | 0.0046 |        |
| Elephant shark      |                     | 21.9                         | 7                  | 0.0027  | 0.0046 |        |
| Lamprey             |                     | 19.6                         | 7                  | 0.0065  | 0.0070 |        |
| Vase tunicate       |                     | 13.6                         | 7                  | 0.0585  | 0.0585 |        |
| Amphioxus           |                     | 20.7                         | 7                  | 0.0042  | 0.0055 |        |
| Medaka              |                     | Medaka                       | 16.4               | 6       | 0.0118 | 0.0130 |
|                     | Amazon molly        | 17.7                         | 6                  | 0.0071  | 0.0100 |        |
|                     | Tilapia             | 18.2                         | 6                  | 0.0058  | 0.0100 |        |
|                     | Fugu                | 17.6                         | 6                  | 0.0073  | 0.0100 |        |
|                     | Zebrafish           | 16.5                         | 6                  | 0.0113  | 0.0130 |        |
|                     | Spotted gar         | 14.0                         | 6                  | 0.0297  | 0.0297 |        |
|                     | Coelacanth          | 18.1                         | 6                  | 0.0060  | 0.0100 |        |
|                     | Elephant shark      | 19.6                         | 6                  | 0.0032  | 0.0094 |        |
|                     | Lamprey             | 19.5                         | 6                  | 0.0034  | 0.0094 |        |
|                     | Vase tunicate       | 19.5                         | 6                  | 0.0034  | 0.0094 |        |
| Amphioxus           | 19.6                | 6                            | 0.0032             | 0.0094  |        |        |



**Table S17.** Statistical information in Figure S10c.

| Species             | Category            | Kruskal–Wallis rank sum test |                    |         |        |        |
|---------------------|---------------------|------------------------------|--------------------|---------|--------|--------|
|                     |                     | Test statistic (H)           | Degrees of freedom | P value | FDR    |        |
| Mouse               | Mouse               | 17.1                         | 7                  | 0.0170  | 0.0227 |        |
|                     | Human               | 16.4                         | 7                  | 0.0216  | 0.0236 |        |
|                     | Cow                 | 17.8                         | 7                  | 0.0130  | 0.0195 |        |
|                     | Opossum             | 19.9                         | 7                  | 0.0058  | 0.0116 |        |
|                     | Chicken             | 21.3                         | 7                  | 0.0033  | 0.0116 |        |
|                     | Western clawed frog | 20.4                         | 7                  | 0.0048  | 0.0116 |        |
|                     | Coelacanth          | 19.9                         | 7                  | 0.0058  | 0.0116 |        |
|                     | Spotted gar         | 18.8                         | 7                  | 0.0088  | 0.0151 |        |
|                     | Elephant shark      | 20.2                         | 7                  | 0.0051  | 0.0116 |        |
|                     | Lamprey             | 16.6                         | 7                  | 0.0202  | 0.0236 |        |
|                     | Vase tunicate       | 15.8                         | 7                  | 0.0267  | 0.0267 |        |
|                     | Amphioxus           | 21.3                         | 7                  | 0.0034  | 0.0116 |        |
|                     | Chicken             | Chicken                      | 18.9               | 7       | 0.0084 | 0.0102 |
|                     |                     | Turkey                       | 16.7               | 7       | 0.0194 | 0.0194 |
| American alligator  |                     | 21.7                         | 7                  | 0.0029  | 0.0058 |        |
| Softshell turtle    |                     | 21.1                         | 7                  | 0.0037  | 0.0060 |        |
| Anole lizard        |                     | 21.6                         | 7                  | 0.0030  | 0.0058 |        |
| Mouse               |                     | 22.1                         | 7                  | 0.0025  | 0.0058 |        |
| Western clawed frog |                     | 22.0                         | 7                  | 0.0026  | 0.0058 |        |
| Coelacanth          |                     | 21.7                         | 7                  | 0.0029  | 0.0058 |        |
| Spotted gar         |                     | 21.5                         | 7                  | 0.0031  | 0.0058 |        |
| Elephant shark      |                     | 21.9                         | 7                  | 0.0026  | 0.0058 |        |
| Lamprey             |                     | 17.7                         | 7                  | 0.0132  | 0.0143 |        |
| Vase tunicate       |                     | 19.3                         | 7                  | 0.0072  | 0.0102 |        |
| Amphioxus           |                     | 18.9                         | 7                  | 0.0086  | 0.0102 |        |
| Medaka              |                     | Medaka                       | 17.0               | 6       | 0.0093 | 0.0128 |
|                     | Amazon molly        | 18.4                         | 6                  | 0.0053  | 0.0121 |        |
|                     | Tilapia             | 17.9                         | 6                  | 0.0066  | 0.0121 |        |
|                     | Fugu                | 17.0                         | 6                  | 0.0092  | 0.0128 |        |
|                     | Zebrafish           | 16.0                         | 6                  | 0.0138  | 0.0169 |        |
|                     | Spotted gar         | 12.4                         | 6                  | 0.0533  | 0.0586 |        |
|                     | Coelacanth          | 18.1                         | 6                  | 0.0060  | 0.0121 |        |
|                     | Elephant shark      | 19.6                         | 6                  | 0.0032  | 0.0121 |        |
|                     | Lamprey             | 18.5                         | 6                  | 0.0052  | 0.0121 |        |
|                     | Vase tunicate       | 11.2                         | 6                  | 0.0838  | 0.0838 |        |
|                     | Amphioxus           | 19.6                         | 6                  | 0.0032  | 0.0121 |        |

**Table S18.** Statistical information in Figure S11.

| Species | Category            | Kruskal–Wallis rank sum test |                    |         |        |
|---------|---------------------|------------------------------|--------------------|---------|--------|
|         |                     | Test statistic (H)           | Degrees of freedom | P value | FDR    |
| Mouse   | Mouse               | 28.1                         | 11                 | 0.0031  | 0.0036 |
|         | Human               | 28.0                         | 11                 | 0.0032  | 0.0036 |
|         | Cow                 | 29.0                         | 11                 | 0.0023  | 0.0035 |
|         | Opossum             | 29.7                         | 11                 | 0.0018  | 0.0034 |
|         | Chicken             | 30.4                         | 11                 | 0.0014  | 0.0034 |
|         | Western clawed frog | 30.2                         | 11                 | 0.0015  | 0.0034 |
|         | Coelacanth          | 30.1                         | 11                 | 0.0015  | 0.0034 |
|         | Spotted gar         | 30.2                         | 11                 | 0.0015  | 0.0034 |
|         | Elephant shark      | 29.4                         | 11                 | 0.0020  | 0.0034 |
|         | Lamprey             | 27.9                         | 11                 | 0.0033  | 0.0036 |
|         | Vase tunicate       | 27.7                         | 11                 | 0.0036  | 0.0036 |
|         | Amphioxus           | 30.3                         | 11                 | 0.0014  | 0.0034 |

**Table S19.** Statistical information in Figure S12a.

| Species             | Category            | Kruskal–Wallis rank sum test |                    |         |        |        |
|---------------------|---------------------|------------------------------|--------------------|---------|--------|--------|
|                     |                     | Test statistic (H)           | Degrees of freedom | P value | FDR    |        |
| Mouse               | Mouse               | 19.8                         | 7                  | 0.0061  | 0.0145 |        |
|                     | Human               | 18.8                         | 7                  | 0.0088  | 0.0149 |        |
|                     | Cow                 | 16.1                         | 7                  | 0.0243  | 0.0292 |        |
|                     | Opossum             | 16.3                         | 7                  | 0.0225  | 0.0292 |        |
|                     | Chicken             | 15.6                         | 7                  | 0.0290  | 0.0316 |        |
|                     | Western clawed frog | 19.3                         | 7                  | 0.0072  | 0.0145 |        |
|                     | Coelacanth          | 15.0                         | 7                  | 0.0357  | 0.0357 |        |
|                     | Spotted gar         | 18.5                         | 7                  | 0.0099  | 0.0149 |        |
|                     | Elephant shark      | 20.0                         | 7                  | 0.0055  | 0.0145 |        |
|                     | Lamprey             | 19.5                         | 7                  | 0.0068  | 0.0145 |        |
|                     | Vase tunicate       | 20.3                         | 7                  | 0.0051  | 0.0145 |        |
|                     | Amphioxus           | 19.4                         | 7                  | 0.0071  | 0.0145 |        |
|                     | Chicken             | Chicken                      | 20.1               | 7       | 0.0053 | 0.0106 |
|                     |                     | Turkey                       | 19.9               | 7       | 0.0059 | 0.0106 |
| American alligator  |                     | 20.2                         | 7                  | 0.0052  | 0.0106 |        |
| Softshell turtle    |                     | 21.7                         | 7                  | 0.0028  | 0.0106 |        |
| Anole lizard        |                     | 19.0                         | 7                  | 0.0081  | 0.0106 |        |
| Mouse               |                     | 19.5                         | 7                  | 0.0068  | 0.0106 |        |
| Western clawed frog |                     | 17.4                         | 7                  | 0.0150  | 0.0163 |        |
| Coelacanth          |                     | 21.5                         | 7                  | 0.0031  | 0.0106 |        |
| Spotted gar         |                     | 19.0                         | 7                  | 0.0081  | 0.0106 |        |
| Elephant shark      |                     | 20.9                         | 7                  | 0.0039  | 0.0106 |        |
| Lamprey             |                     | 21.3                         | 7                  | 0.0034  | 0.0106 |        |
| Vase tunicate       |                     | 17.4                         | 7                  | 0.0150  | 0.0163 |        |
| Amphioxus           |                     | 15.4                         | 7                  | 0.0317  | 0.0317 |        |
| Medaka              |                     | Medaka                       | 17.8               | 6       | 0.0067 | 0.0067 |
|                     | Amazon molly        | 18.7                         | 6                  | 0.0047  | 0.0052 |        |
|                     | Tilapia             | 19.2                         | 6                  | 0.0039  | 0.0051 |        |
|                     | Fugu                | 19.3                         | 6                  | 0.0036  | 0.0051 |        |
|                     | Zebrafish           | 19.6                         | 6                  | 0.0032  | 0.0051 |        |
|                     | Spotted gar         | 19.4                         | 6                  | 0.0036  | 0.0051 |        |
|                     | Coelacanth          | 19.5                         | 6                  | 0.0034  | 0.0051 |        |
|                     | Elephant shark      | 19.4                         | 6                  | 0.0036  | 0.0051 |        |
|                     | Lamprey             | 19.4                         | 6                  | 0.0036  | 0.0051 |        |
|                     | Vase tunicate       | 19.0                         | 6                  | 0.0042  | 0.0051 |        |
|                     | Amphioxus           | 19.5                         | 6                  | 0.0034  | 0.0051 |        |

**Table S20.** Statistical information in Figure S12b.

| Species             | Category            | Kruskal–Wallis rank sum test |                    |         |        |        |
|---------------------|---------------------|------------------------------|--------------------|---------|--------|--------|
|                     |                     | Test statistic (H)           | Degrees of freedom | P value | FDR    |        |
| Mouse               | Mouse               | 18.7                         | 7                  | 0.0091  | 0.0144 |        |
|                     | Human               | 19.4                         | 7                  | 0.0071  | 0.0144 |        |
|                     | Cow                 | 19.1                         | 7                  | 0.0078  | 0.0144 |        |
|                     | Opossum             | 19.7                         | 7                  | 0.0064  | 0.0144 |        |
|                     | Chicken             | 19.5                         | 7                  | 0.0066  | 0.0144 |        |
|                     | Western clawed frog | 20.2                         | 7                  | 0.0052  | 0.0144 |        |
|                     | Coelacanth          | 13.5                         | 7                  | 0.0612  | 0.0612 |        |
|                     | Spotted gar         | 16.6                         | 7                  | 0.0204  | 0.0223 |        |
|                     | Elephant shark      | 18.6                         | 7                  | 0.0096  | 0.0144 |        |
|                     | Lamprey             | 16.7                         | 7                  | 0.0194  | 0.0223 |        |
|                     | Vase tunicate       | 17.1                         | 7                  | 0.0170  | 0.0223 |        |
|                     | Amphioxus           | 21.0                         | 7                  | 0.0037  | 0.0144 |        |
|                     | Chicken             | Chicken                      | 16.0               | 7       | 0.0252 | 0.0252 |
|                     |                     | Turkey                       | 18.4               | 7       | 0.0101 | 0.0146 |
| American alligator  |                     | 21.6                         | 7                  | 0.0030  | 0.0108 |        |
| Softshell turtle    |                     | 21.7                         | 7                  | 0.0029  | 0.0108 |        |
| Anole lizard        |                     | 22.0                         | 7                  | 0.0025  | 0.0108 |        |
| Mouse               |                     | 21.3                         | 7                  | 0.0033  | 0.0108 |        |
| Western clawed frog |                     | 17.9                         | 7                  | 0.0125  | 0.0163 |        |
| Coelacanth          |                     | 18.5                         | 7                  | 0.0097  | 0.0146 |        |
| Spotted gar         |                     | 20.3                         | 7                  | 0.0050  | 0.0108 |        |
| Elephant shark      |                     | 16.5                         | 7                  | 0.0212  | 0.0230 |        |
| Lamprey             |                     | 17.4                         | 7                  | 0.0150  | 0.0177 |        |
| Vase tunicate       |                     | 19.1                         | 7                  | 0.0079  | 0.0146 |        |
| Amphioxus           |                     | 20.3                         | 7                  | 0.0050  | 0.0108 |        |
| Medaka              |                     | Medaka                       | 17                 | 6       | 0.0094 | 0.0207 |
|                     | Amazon molly        | 18                           | 6                  | 0.0062  | 0.0207 |        |
|                     | Tilapia             | 17.1                         | 6                  | 0.0088  | 0.0207 |        |
|                     | Fugu                | 16.4                         | 6                  | 0.0116  | 0.0213 |        |
|                     | Zebrafish           | 11.3                         | 6                  | 0.0798  | 0.0975 |        |
|                     | Spotted gar         | 9.16                         | 6                  | 0.1650  | 0.1815 |        |
|                     | Coelacanth          | 14.4                         | 6                  | 0.0252  | 0.0347 |        |
|                     | Elephant shark      | 19.6                         | 6                  | 0.0032  | 0.0177 |        |
|                     | Lamprey             | 14.8                         | 6                  | 0.0220  | 0.0346 |        |
|                     | Vase tunicate       | 8.76                         | 6                  | 0.1870  | 0.1870 |        |
| Amphioxus           | 19.6                | 6                            | 0.0032             | 0.0177  |        |        |

**Table S21.** Statistical information in Figure S12c.

| Species             | Category            | Kruskal–Wallis rank sum test |                    |         |        |        |
|---------------------|---------------------|------------------------------|--------------------|---------|--------|--------|
|                     |                     | Test statistic (H)           | Degrees of freedom | P value | FDR    |        |
| Mouse               | Mouse               | 19.9                         | 7                  | 0.0059  | 0.0088 |        |
|                     | Human               | 16.1                         | 7                  | 0.0245  | 0.0267 |        |
|                     | Cow                 | 15.0                         | 7                  | 0.0357  | 0.0357 |        |
|                     | Opossum             | 21.2                         | 7                  | 0.0034  | 0.0059 |        |
|                     | Chicken             | 22.2                         | 7                  | 0.0024  | 0.0052 |        |
|                     | Western clawed frog | 22.4                         | 7                  | 0.0022  | 0.0052 |        |
|                     | Coelacanth          | 21.9                         | 7                  | 0.0026  | 0.0052 |        |
|                     | Spotted gar         | 21.9                         | 7                  | 0.0026  | 0.0052 |        |
|                     | Elephant shark      | 22.2                         | 7                  | 0.0023  | 0.0052 |        |
|                     | Lamprey             | 18.3                         | 7                  | 0.0109  | 0.0145 |        |
|                     | Vase tunicate       | 17.5                         | 7                  | 0.0147  | 0.0176 |        |
|                     | Amphioxus           | 22.3                         | 7                  | 0.0023  | 0.0052 |        |
|                     | Chicken             | Chicken                      | 20.5               | 7       | 0.0046 | 0.0075 |
|                     |                     | Turkey                       | 18.0               | 7       | 0.0121 | 0.0143 |
| American alligator  |                     | 20.7                         | 7                  | 0.0046  | 0.0075 |        |
| Softshell turtle    |                     | 21.2                         | 7                  | 0.0035  | 0.0075 |        |
| Anole lizard        |                     | 21.5                         | 7                  | 0.0081  | 0.0117 |        |
| Mouse               |                     | 22.0                         | 7                  | 0.0025  | 0.0075 |        |
| Western clawed frog |                     | 22.1                         | 7                  | 0.0024  | 0.0075 |        |
| Coelacanth          |                     | 21.8                         | 7                  | 0.0027  | 0.0075 |        |
| Spotted gar         |                     | 21.6                         | 7                  | 0.0030  | 0.0075 |        |
| Elephant shark      |                     | 21.6                         | 7                  | 0.0030  | 0.0075 |        |
| Lamprey             |                     | 18.6                         | 7                  | 0.0096  | 0.0125 |        |
| Vase tunicate       |                     | 13.6                         | 7                  | 0.0588  | 0.0588 |        |
| Amphioxus           |                     | 17.6                         | 7                  | 0.0137  | 0.0148 |        |
| Medaka              |                     | Medaka                       | 16.6               | 6       | 0.0111 | 0.0111 |
|                     | Amazon molly        | 17.8                         | 6                  | 0.0067  | 0.0104 |        |
|                     | Tilapia             | 18.4                         | 6                  | 0.0053  | 0.0104 |        |
|                     | Fugu                | 16.7                         | 6                  | 0.0085  | 0.0104 |        |
|                     | Zebrafish           | 17.5                         | 6                  | 0.0063  | 0.0104 |        |
|                     | Spotted gar         | 17.8                         | 6                  | 0.0079  | 0.0104 |        |
|                     | Coelacanth          | 17.5                         | 6                  | 0.0057  | 0.0104 |        |
|                     | Elephant shark      | 19.1                         | 6                  | 0.0042  | 0.0104 |        |
|                     | Lamprey             | 19.3                         | 6                  | 0.0097  | 0.0106 |        |
|                     | Vase tunicate       | 19                           | 6                  | 0.0044  | 0.0104 |        |
|                     | Amphioxus           | 19.5                         | 6                  | 0.0049  | 0.0104 |        |

**Table S22.** Statistical information in Figure S13.

| Species             | Category            | Kruskal–Wallis rank sum test |                    |         |        |        |
|---------------------|---------------------|------------------------------|--------------------|---------|--------|--------|
|                     |                     | Test statistic (H)           | Degrees of freedom | P value | FDR    |        |
| Mouse               | Human               | 17.4                         | 7                  | 0.0149  | 0.0170 |        |
|                     | Cow                 | 17.6                         | 7                  | 0.0141  | 0.0170 |        |
|                     | Opossum             | 21.5                         | 7                  | 0.0031  | 0.0073 |        |
|                     | Chicken             | 21.7                         | 7                  | 0.0028  | 0.0073 |        |
|                     | Western clawed frog | 21.2                         | 7                  | 0.0035  | 0.0073 |        |
|                     | Coelacanth          | 21.2                         | 7                  | 0.0034  | 0.0073 |        |
|                     | Spotted gar         | 17.6                         | 7                  | 0.0141  | 0.0170 |        |
|                     | Elephant shark      | 22.1                         | 7                  | 0.0025  | 0.0073 |        |
|                     | Lamprey             | 17.1                         | 7                  | 0.0170  | 0.0170 |        |
|                     | Vase tunicate       | 17.1                         | 7                  | 0.0168  | 0.0170 |        |
|                     | Amphioxus           | 20.9                         | 7                  | 0.0040  | 0.0073 |        |
|                     | Chicken             | Turkey                       | 22.2               | 7       | 0.0024 | 0.0048 |
|                     |                     | American alligator           | 22.0               | 7       | 0.0025 | 0.0048 |
|                     |                     | Softshell turtle             | 21.0               | 7       | 0.0038 | 0.0051 |
| Anole lizard        |                     | 21.5                         | 7                  | 0.0032  | 0.0048 |        |
| Mouse               |                     | 21.9                         | 7                  | 0.0026  | 0.0048 |        |
| Western clawed frog |                     | 21.9                         | 7                  | 0.0026  | 0.0048 |        |
| Coelacanth          |                     | 21.8                         | 7                  | 0.0027  | 0.0048 |        |
| Spotted gar         |                     | 21.5                         | 7                  | 0.0031  | 0.0048 |        |
| Elephant shark      |                     | 21.9                         | 7                  | 0.0027  | 0.0048 |        |
| Lamprey             |                     | 17.4                         | 7                  | 0.0148  | 0.0148 |        |
| Vase tunicate       |                     | 19.3                         | 7                  | 0.0074  | 0.0089 |        |
| Amphioxus           |                     | 18.8                         | 7                  | 0.0087  | 0.0095 |        |
| Medaka              |                     | Amazon molly                 | 18.0               | 6       | 0.0062 | 0.0115 |
|                     |                     | Tilapia                      | 18.5               | 6       | 0.0051 | 0.0115 |
|                     | Fugu                | 17.7                         | 6                  | 0.0069  | 0.0115 |        |
|                     | Zebrafish           | 16.5                         | 6                  | 0.0113  | 0.0141 |        |
|                     | Spotted gar         | 14.9                         | 6                  | 0.0211  | 0.0234 |        |
|                     | Coelacanth          | 18.3                         | 6                  | 0.0056  | 0.0115 |        |
|                     | Elephant shark      | 19.6                         | 6                  | 0.0032  | 0.0115 |        |
|                     | Lamprey             | 16.6                         | 6                  | 0.0110  | 0.0141 |        |
|                     | Vase tunicate       | 9.1                          | 6                  | 0.1680  | 0.1680 |        |
|                     | Amphioxus           | 19.6                         | 6                  | 0.0032  | 0.0115 |        |
